# Supplementary material for: Robust half-metallicities and perfect spin transport properties in 2D transition metal dichlorides
Source: Royal Society of Chemistry journal article supplement (doi:10.1039/c8tc00443a), 2018-01-01
Supplement: c8tc00443a1.pdf [file c8tc00443a1.pdf]

## Supplementary Materials for “Robust half-metallicities and perfect spin transport properties in 2D transition metal dichlorides”

Yulin Feng,<sup>a</sup> Xuming Wu,<sup>a</sup> Jiangchao Han<sup>a</sup> and Guoying Gao<sup>\*ab</sup>

<sup>a</sup>School of Physics Huazhong University of Science and Technology, Wuhan 430074, China

<sup>b</sup>Wuhan National High Magnetic Field Center, Huazhong University of Science and Technology, Wuhan 430074, China

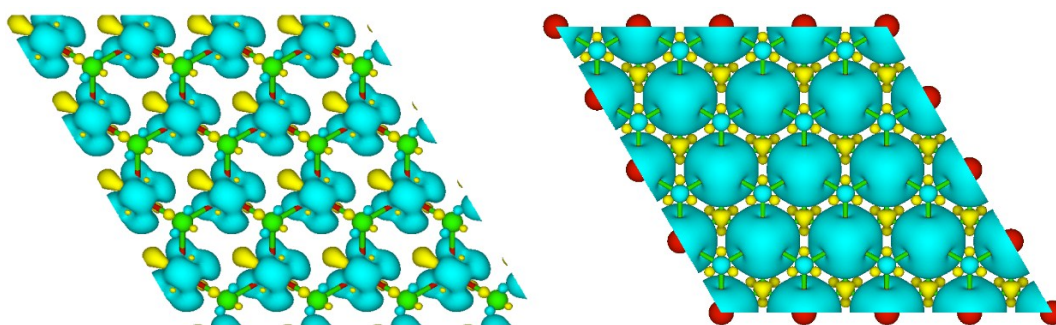

**Fig. S1** The spin density isosurface plots (keeping the same value of  $0.0026 e/\text{\AA}^3$  for both plots) for (a) 1H-VCl<sub>2</sub> monolayer and (b) 1T-VCl<sub>2</sub> monolayer. The cyan and yellow isosurfaces represent the spin-up and spin-down components, respectively.

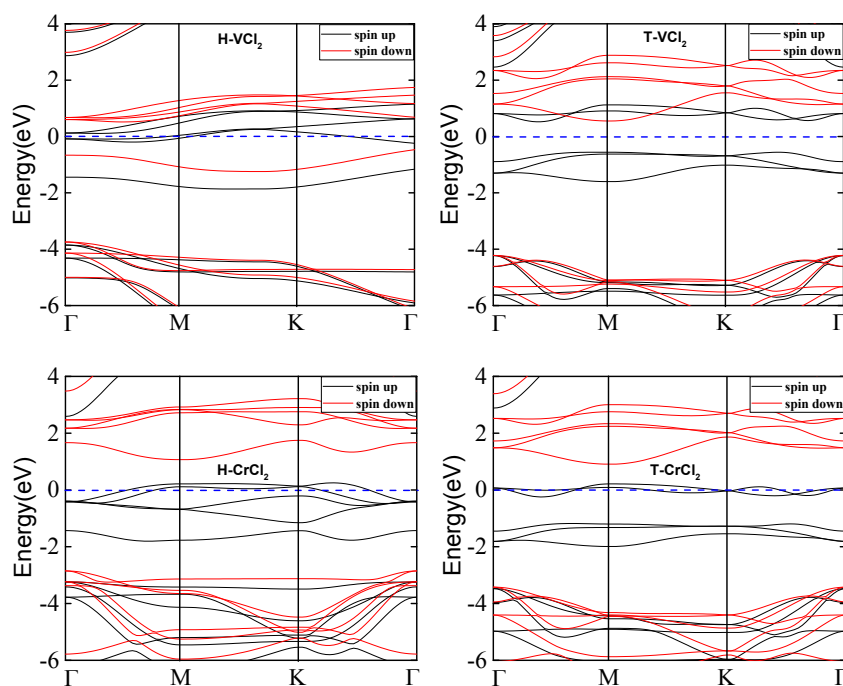

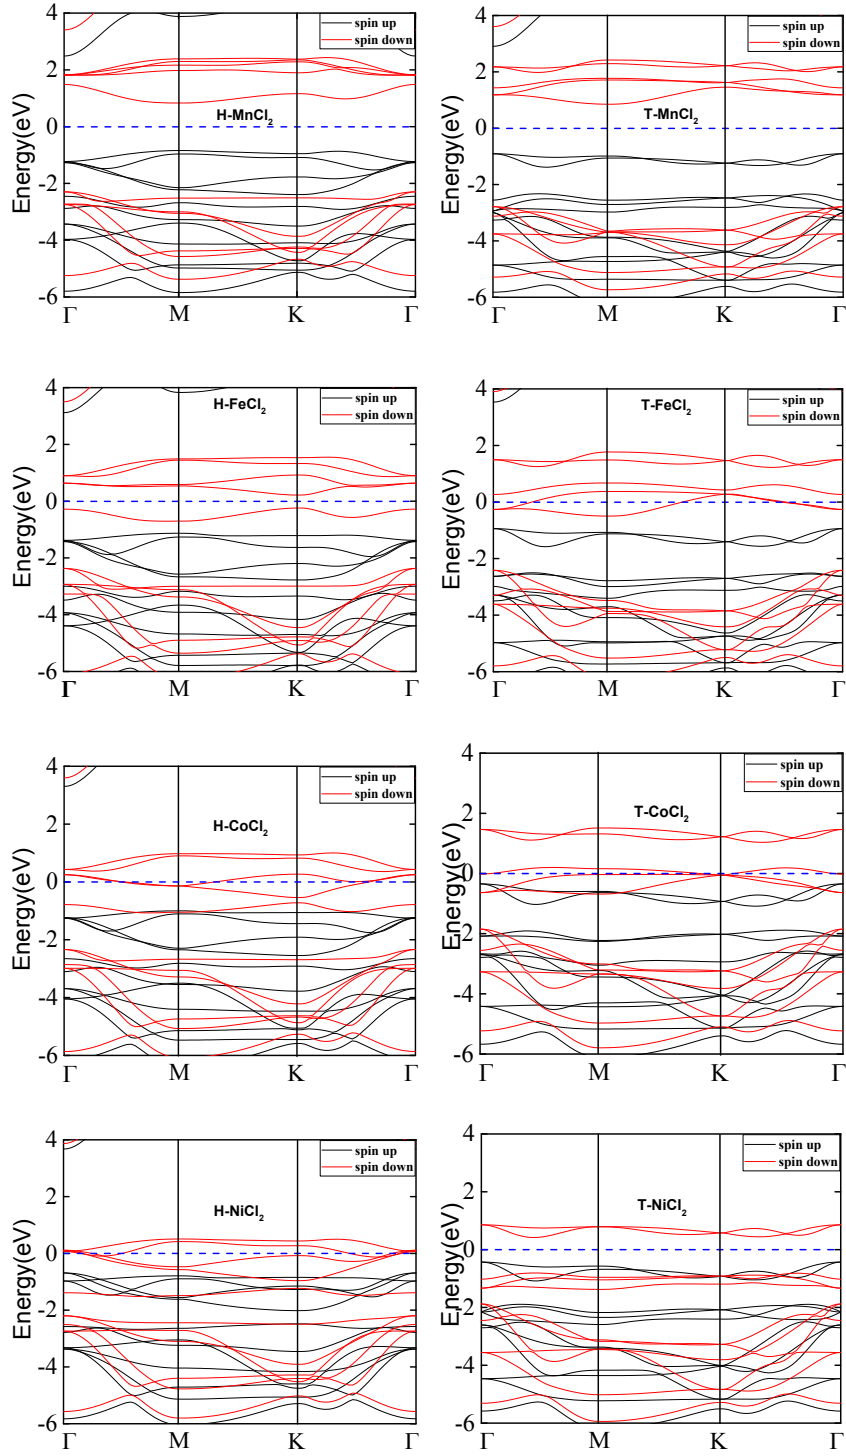

**Fig. S2** The calculated spin-dependent band structures of 1H- and 1T-MCl<sub>2</sub> monolayers at equilibrium lattice constants. The dashed line indicates the Fermi level at zero eV.

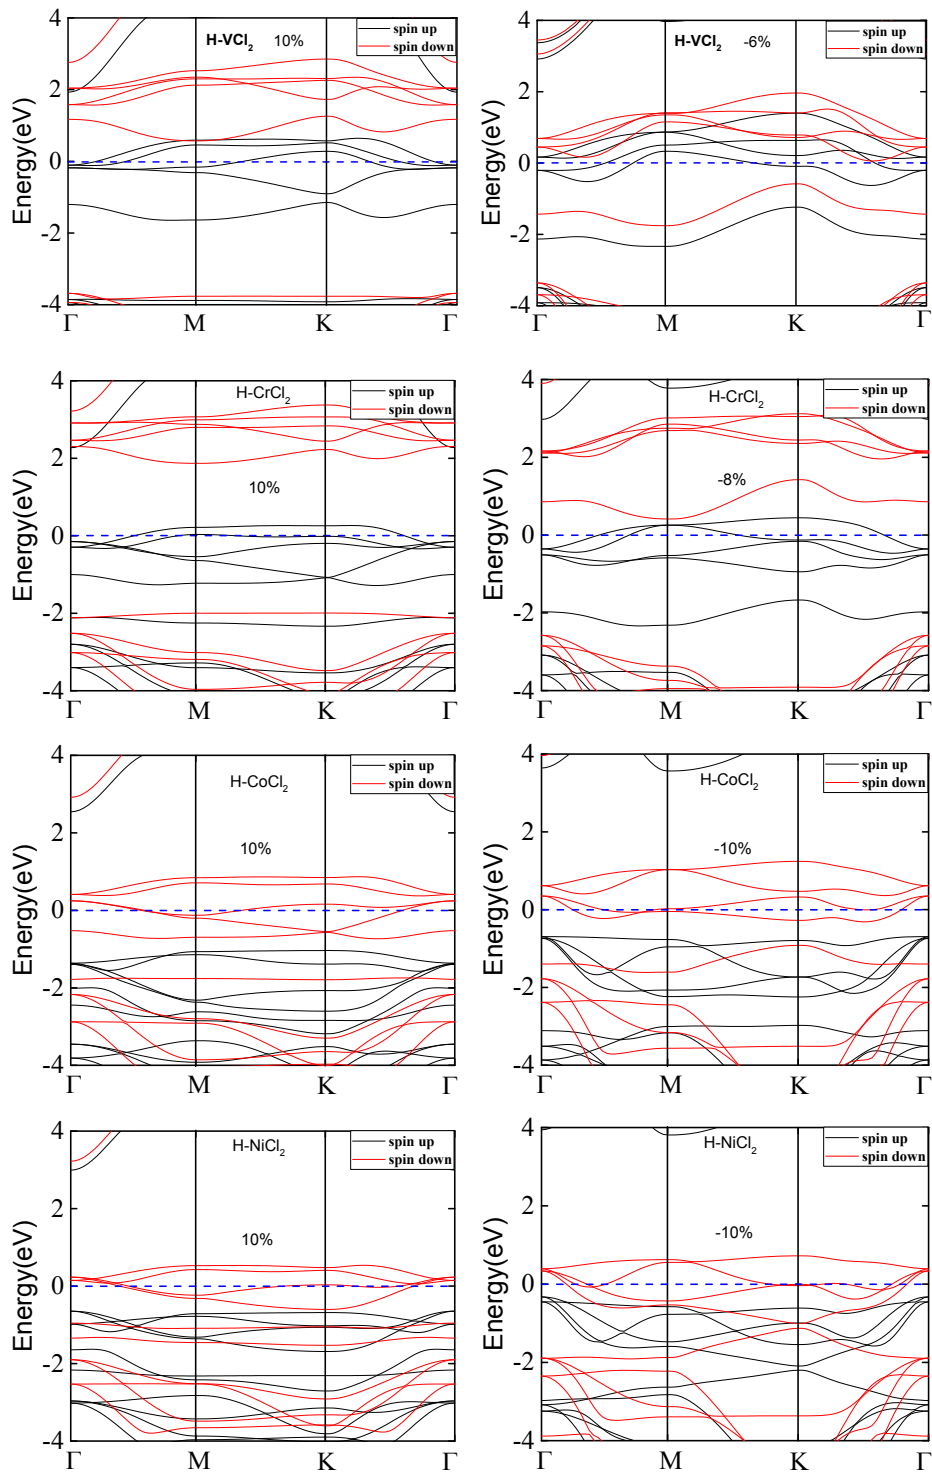

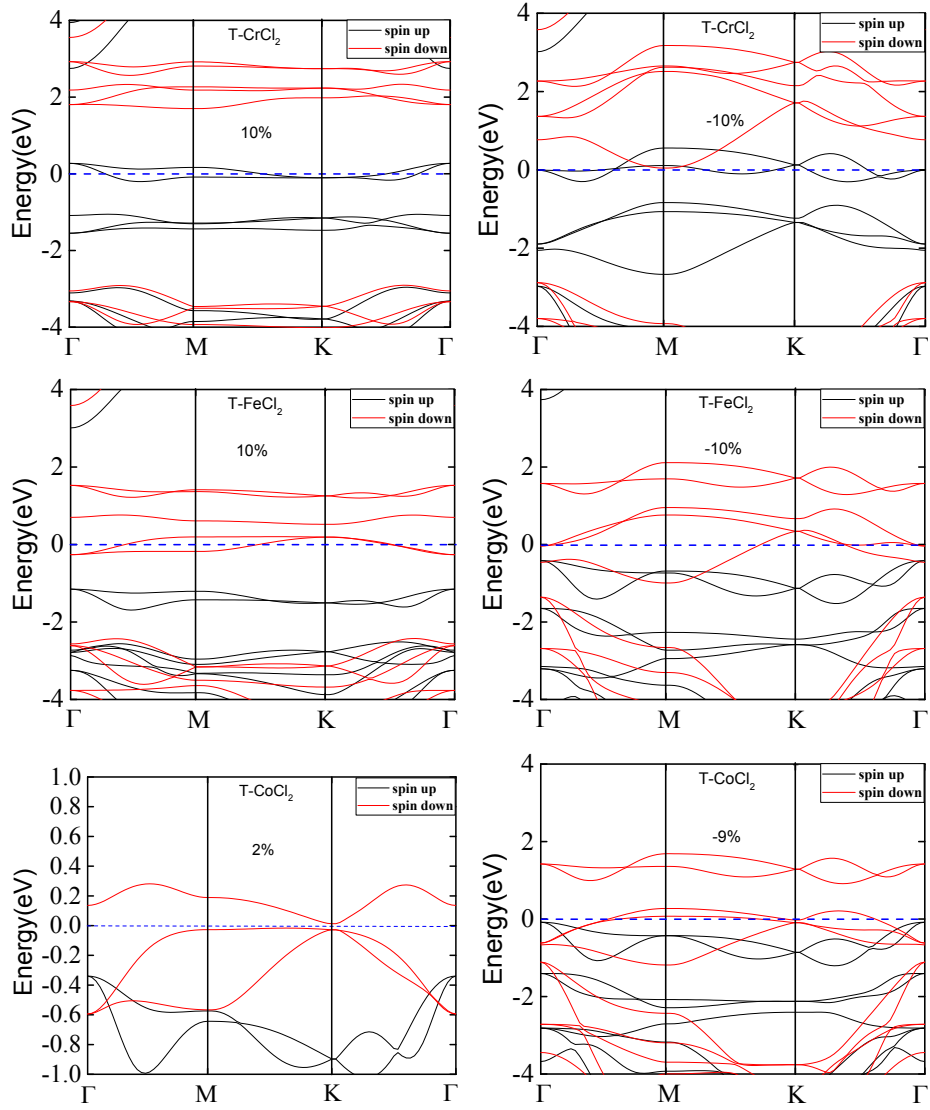

**Fig. S3** The calculated spin-dependent band structures of half-metallic 1H-VCl<sub>2</sub>, CrCl<sub>2</sub>, CoCl<sub>2</sub> and NiCl<sub>2</sub> monolayers as well as 1T-CrCl<sub>2</sub>, FeCl<sub>2</sub> and CoCl<sub>2</sub> monolayers at biaxial strains. The dashed line indicates the Fermi level at zero eV.
